# Supplementary material
Source: Research Square preprint supplement (doi:10.21203/rs.3.rs-10371128/v1)
Supplement: Supplementary file 1 [file 9e5cc85b05436672359129a6.docx]

**APPENDICES**

**Appendix A: PRISMA 2020 Checklist**

| **Section/Topic** | **Item** | **Checklist Item** | **Location (Page)** |
| --- | --- | --- | --- |
| **TITLE** | 1 | Identify the report as a systematic review. | 1 |
| **ABSTRACT** | 2 | Structured summary (objectives, methods, results, conclusions). | 2 |
| **INTRODUCTION** |  |  |  |
| Rationale | 3 | Describe the rationale for the review in context. | 3–4 |
| Objectives | 4 | Provide explicit statement of objectives, PICO/mechanisms. | 5 |
| **METHODS** |  |  |  |
| Eligibility criteria | 5 | Specify inclusion/exclusion criteria (population, timeframe, setting). | 6 |
| Information sources | 6 | Specify databases (Scopus, WoS, ERIC, etc.) and dates (2015–2025). | 6 |
| Search strategy | 7 | Present full search strategy for at least one database. | 7 |
| Selection process | 8 | State process for screening (PRISMA flow). | 7 |
| Data collection | 9 | Describe data extraction from reports. | 8 |
| Data items | 10 | List all variables/outcomes (innovation, leadership types, mediators). | 8 |
| Risk of bias | 11 | Specify JBI/CASP appraisal methods. | 9 |
| Effect measures | 12 | Specify correlation coefficients (r), CIs, I² for heterogeneity. | 9 |
| Synthesis methods | 13 | Describe narrative synthesis and AMO/SET/Contingency integration. | 10 |
| Certainty assessment | 14 | Describe methods for assessing publication bias (funnel plot/trim-fill). | 10 |
| **RESULTS** |  |  |  |
| Study selection | 15 | Describe screening results (63 retained, 45 high/18 moderate). | 11 |
| Study characteristics | 16 | Present characteristics (TVET-specific n=3, cross-sectional 65%). | 11–12 |
| Risk of bias | 17 | Present RoB assessment across studies. | 12 |
| Individual studies | 18 | Present effects for each leadership style (ranges, CIs). | 13–14 |
| Synthesis | 19 | Summarise mechanisms (motivational 81-83%, cognitive 82%, relational 81%). | 14–15 |
| Certainty | 20 | Discuss publication bias (10-15% inflation) and heterogeneity (I²=86.1%). | 16 |
| **DISCUSSION** |  |  |  |
| Interpretation | 21 | Interpret findings (moderators: power distance, autonomy, resources). | 17–18 |
| Generalisability | 22 | Discuss limitations (African/TVET gap, cross-sectional design). | 19 |
| **OTHER** |  |  |  |
| Funding | 23–27 | Registration, support, conflicts, data availability, etc. (none declared). |  |

**Appendix B: Complete Search Strategies**

| **Database** | **Search Field / Syntax** | **Full Search String** | **Platform-Specific Filters** |
| --- | --- | --- | --- |
| **Scopus** | TITLE-ABS-KEY (Title, Abstract, Keywords) | TITLE-ABS-KEY( ("transformational leadership" OR "entrepreneurial leadership" OR "empowering leadership" OR "leadership style*" OR "leader*") AND ("innovation" OR "innovative work behavior" OR "organizational innovation" OR "product innovation" OR "process innovation") AND ("mechanism*" OR "mediator*" OR "moderator*" OR "AMO" OR "social exchange" OR "organizational learning" OR "knowledge sharing" OR "psychological empowerment" OR "intrinsic motivation" OR "organizational culture" OR "trust") AND ("TVET" OR "technical and vocational education" OR "vocational training" OR "developing econom*" OR "Ethiopia") ) AND PUBYEAR > 2014 AND PUBYEAR < 2026 AND (LIMIT-TO (DOCTYPE, "ar")) AND (LIMIT-TO (LANGUAGE, "English")) | **Built into the string:** Date (2015–2025), Document type (Articles), Language (English) |
| **Web of Science** | TS (Topic = Title, Abstract, Author Keywords, Keywords Plus) | TS = ( ("transformational leadership" OR "entrepreneurial leadership" OR "empowering leadership" OR "leadership style*" OR "leader*") AND ("innovation" OR "innovative work behavior" OR "organizational innovation" OR "product innovation" OR "process innovation") AND ("mechanism*" OR "mediator*" OR "moderator*" OR "AMO" OR "social exchange" OR "organizational learning" OR "knowledge sharing" OR "psychological empowerment" OR "intrinsic motivation" OR "organizational culture" OR "trust") AND ("TVET" OR "technical and vocational education" OR "vocational training" OR "developing econom*" OR "Ethiopia") ) | **Applied via interface:** Timespan 2015–2025; Language: English; Document Types: Article; Indexes: SCI-EXPANDED, SSCI, CPCI-S, CPCI-SSH, ESCI |
| **ERIC** | All fields (Title, Abstract, Descriptors) | ("transformational leadership" OR "entrepreneurial leadership" OR "empowering leadership" OR "leadership style*" OR "leader*") AND ("innovation" OR "innovative work behavior" OR "organizational innovation" OR "product innovation" OR "process innovation") AND ("mechanism*" OR "mediator*" OR "moderator*" OR "AMO" OR "social exchange" OR "organizational learning" OR "knowledge sharing" OR "psychological empowerment" OR "intrinsic motivation" OR "organizational culture" OR "trust") AND ("TVET" OR "technical and vocational education" OR "vocational training" OR "developing econom*" OR "Ethiopia" OR "vocational education") | **Applied via interface:** Publication Date 2015–2025; Language: English; Document Type: Journal articles; Peer Reviewed: Yes |
| **ScienceDirect** | Simple keyword search (Title, Abstract, Author Keywords) – field codes not supported in string | ("transformational leadership" OR "entrepreneurial leadership" OR "empowering leadership" OR "leadership style" OR "leader") AND ("innovation" OR "innovative work behavior" OR "organizational innovation" OR "product innovation" OR "process innovation") AND ("mechanism" OR "mediator" OR "moderator" OR "AMO" OR "social exchange" OR "organizational learning" OR "knowledge sharing" OR "psychological empowerment" OR "intrinsic motivation" OR "organizational culture" OR "trust") AND ("TVET" OR "technical and vocational education" OR "vocational training" OR "developing economy" OR "Ethiopia") | **Applied post-search via sidebar:** Years 2015–2025; Language: English; Article type: Research/Review articles; Subject areas: Social Sciences, Psychology, Business, Management |
| **SpringerLink** | Basic keyword search – truncation (*) and field codes not fully supported | "transformational leadership" OR "entrepreneurial leadership" OR "empowering leadership" OR "leadership style" OR "leader" AND "innovation" OR "innovative work behavior" OR "organizational innovation" OR "product innovation" OR "process innovation" AND "mechanism" OR "mediator" OR "moderator" OR "AMO" OR "social exchange" OR "organizational learning" OR "knowledge sharing" OR "psychological empowerment" OR "intrinsic motivation" OR "organizational culture" OR "trust" AND "TVET" OR "technical and vocational education" OR "vocational training" OR "developing economy" OR "Ethiopia" | **Applied post-search via sidebar:** Date range 2015–2025; Language: English; Content type: Article; Disciplines: Education, Business a |

**Appendix C: Quality Appraisal Results**

| **Criteria** | **Scoring** | **Quality Classification** |
| --- | --- | --- |
| **JBI** (Quantitative: cross-sectional, cohort, quasi-experimental) | 8–11 items depending on design | 1 point per "Yes" | High: ≥ 80% / Moderate: 60–79% / Low: < 60% |
| **CASP** (Qualitative studies) | 10 items | 1 point per "Yes" (0 for No/Unclear) | High: 8–10 / Moderate: 5–7 / Low: 0–4 |
